# Supplementary material
Source: PubMed Central journal article supplement (PMC5918726)

### Additional file 1: Figure S1. LINC Enrollment

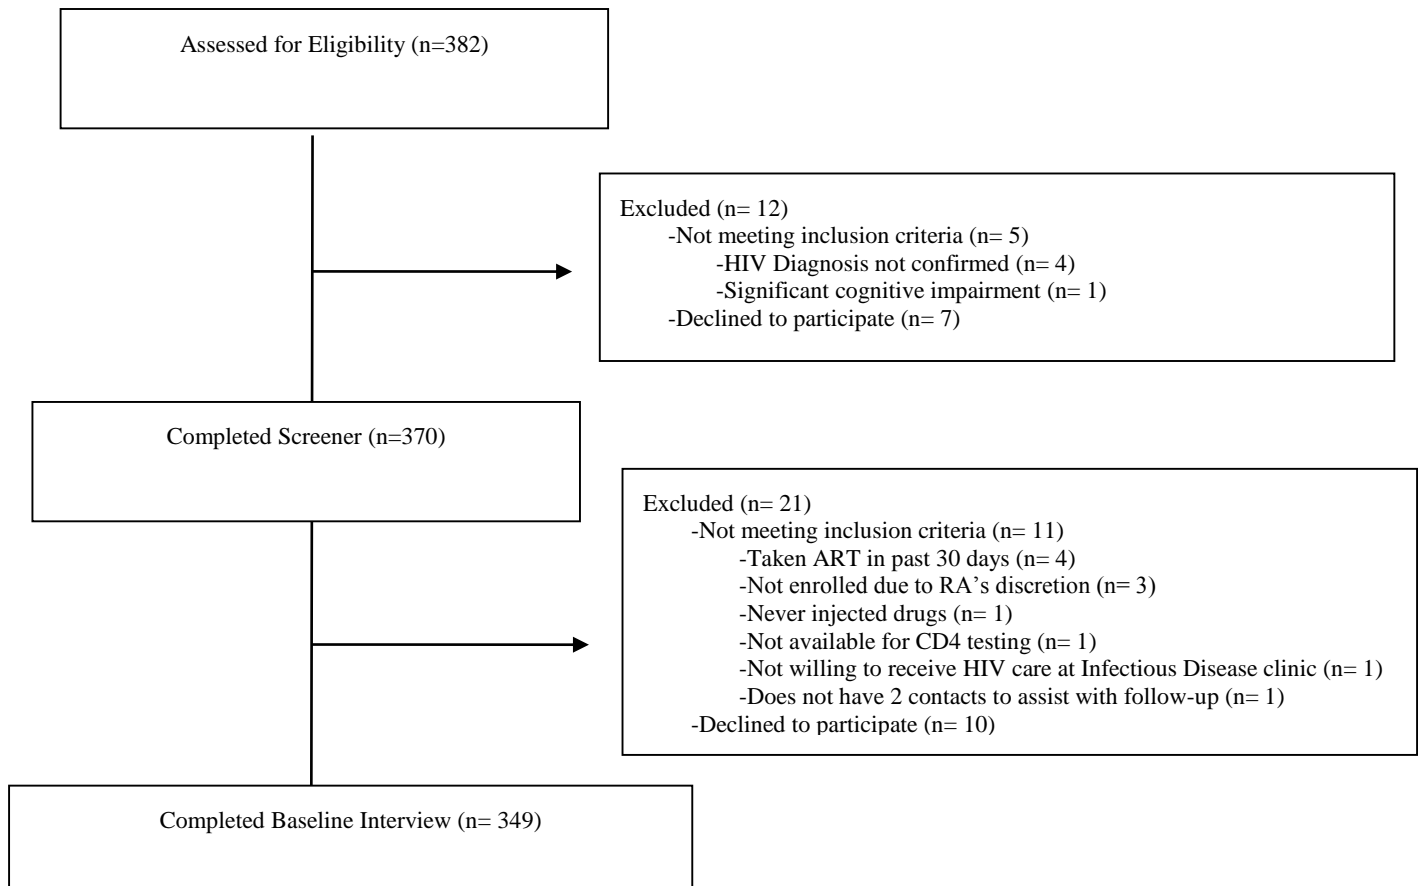

Supplement: 41124_2016_20_MOESM1_ESM.pdf [file 41124_2016_20_MOESM1_ESM.pdf]
