# Supplementary material
Source: PubMed Central journal article supplement (PMC5918726)

## Additional file 2: Figure S2 Russia ARCH Enrollment

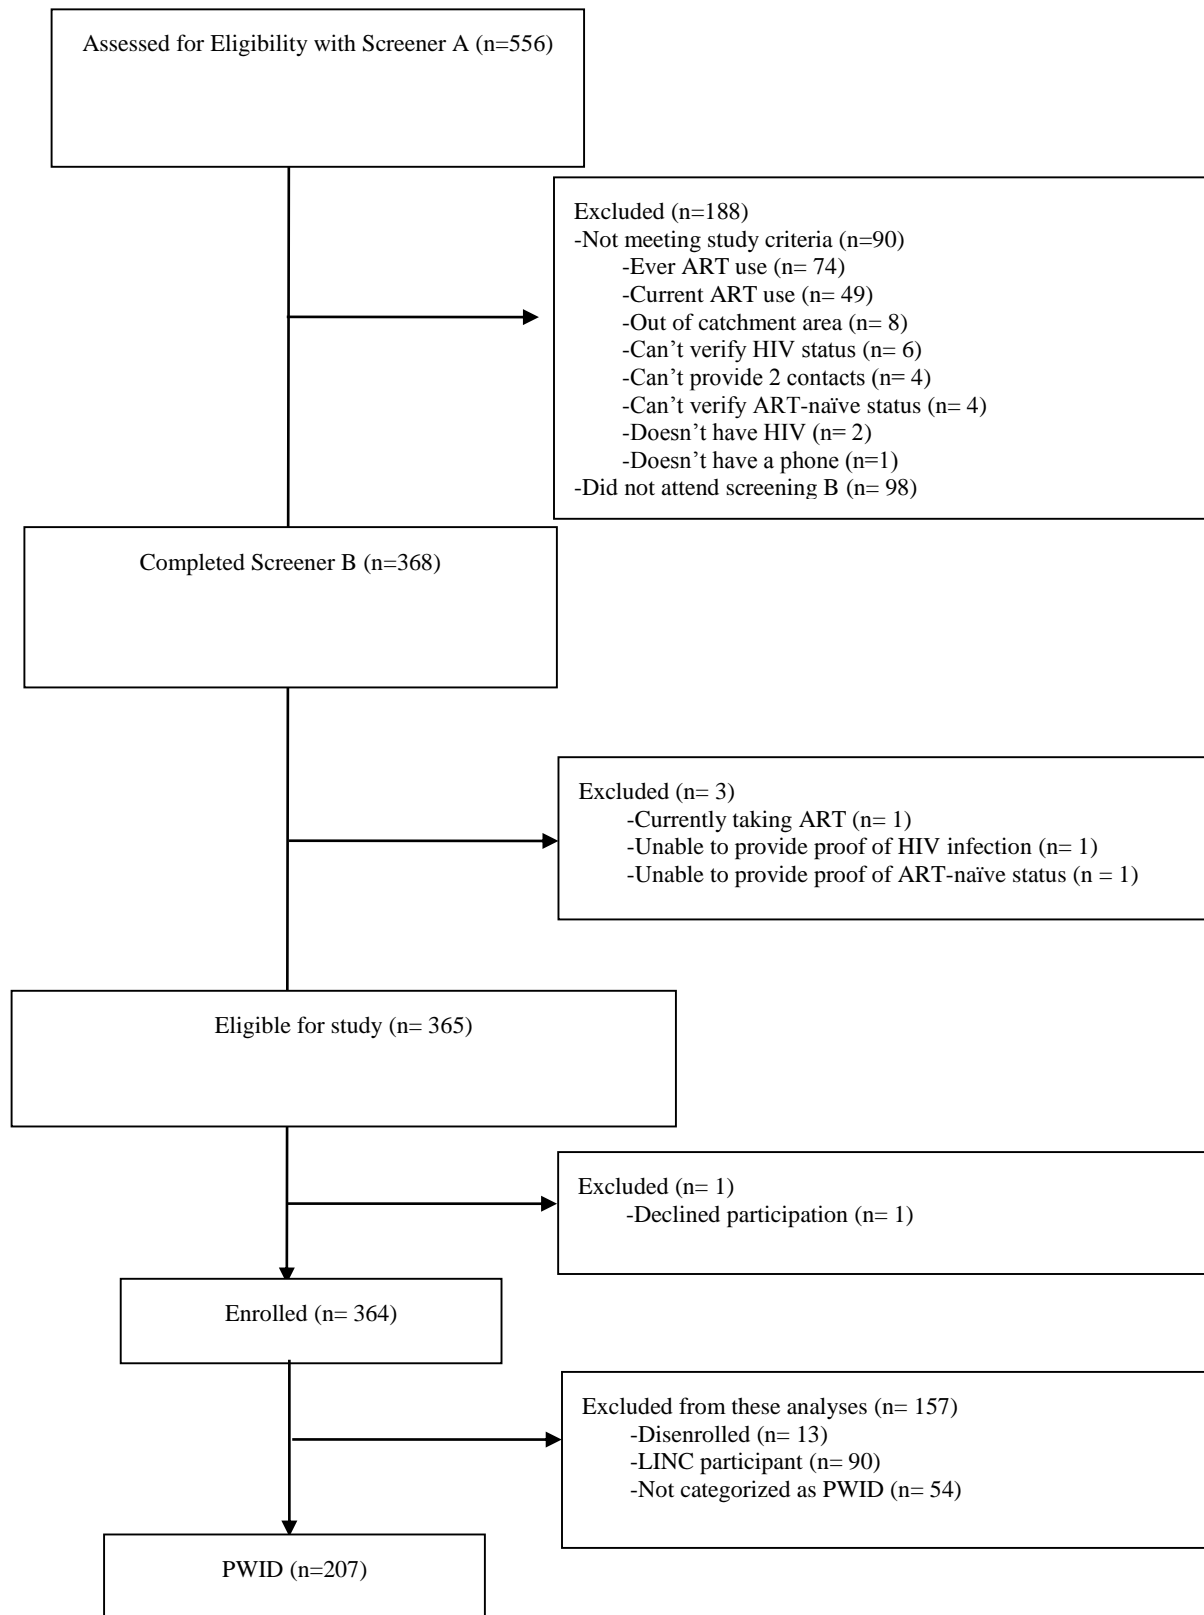

Supplement: 41124_2016_20_MOESM2_ESM.pdf [file 41124_2016_20_MOESM2_ESM.pdf]
